# Supplementary material for: 5-CQA and Mangiferin, Two Leaf Biomarkers of Adaptation to Full Sun or Shade Conditions in Coffea arabica L
Source: PubMed Central journal article supplement (PMC7599603; doi:10.3390/metabo10100383), 2020-09-26
Supplement: metabolites-10-00383-s001.pdf [file metabolites-10-00383-s001.pdf]

Table S1. Content in phenolic compounds of mature leaves of *C. arabica* cv. Marsellesa grown at two different elevations (650 and 1250 m asl) and in full-sun vs under shade (means and standard deviation of ten and nine plants, respectively). Different letters indicate significant differences at  $p < 0.05$  (Newman–Keuls test) among means.

| Compounds                |                         | Content (mg.100 <sup>-1</sup> mg DW leaves) |                       |                       |                       |                      |
|--------------------------|-------------------------|---------------------------------------------|-----------------------|-----------------------|-----------------------|----------------------|
|                          |                         | Low elevation                               |                       | High elevation        |                       |                      |
|                          |                         | Full sun                                    | Shade                 | Full sun              | Shade                 |                      |
| <b>Chlorogenic acids</b> | 3-CQA                   | 0.06 ± 0.01 <i>a</i>                        | 0.05 ± 0.02 <i>ab</i> | 0.04 ± 0.01 <i>ab</i> | 0.04 ± 0.01 <i>b</i>  |                      |
|                          | 5-CQA                   | 4.83 ± 0.57 <i>a</i>                        | 3.45 ± 0.36 <i>b</i>  | 3.00 ± 0.43 <i>b</i>  | 3.15 ± 0.32 <i>b</i>  |                      |
|                          | 4-CQA                   | 0.19 ± 0.03 <i>a</i>                        | 0.17 ± 0.03 <i>a</i>  | 0.12 ± 0.03 <i>b</i>  | 0.15 ± 0.01 <i>b</i>  |                      |
|                          | 3,4-diCQA               | 0.04 ± 0.01 <i>a</i>                        | 0.03 ± 0.01 <i>b</i>  | 0.01 ± 0.01 <i>c</i>  | 0.03 ± 0.01 <i>bc</i> |                      |
|                          | 3,5-diCQA               | 0.12 ± 0.04 <i>a</i>                        | 0.11 ± 0.01 <i>a</i>  | 0.07 ± 0.03 <i>b</i>  | 0.12 ± 0.01 <i>a</i>  |                      |
|                          | 4,5-diCQA               | 0.04 ± 0.01 <i>a</i>                        | 0.02 ± 0.01 <i>b</i>  | 0.01 ± 0.01 <i>c</i>  | 0.02 ± 0.01 <i>b</i>  |                      |
|                          | FQA                     | 0.07 ± 0.02 <i>a</i>                        | 0.05 ± 0.03 <i>a</i>  | 0.05 ± 0.03 <i>a</i>  | 0.06 ± 0.01 <i>a</i>  |                      |
| <b>Flavonoids</b>        | F-dihex                 | 0.60 ± 0.18 <i>a</i>                        | 0.33 ± 0.10 <i>b</i>  | 0.34 ± 0.11 <i>b</i>  | 0.30 ± 0.01 <i>b</i>  |                      |
|                          | Q-dihex-dhex            | 0.04 ± 0.01 <i>b</i>                        | 0.02 ± 0.01 <i>c</i>  | 0.05 ± 0.01 <i>a</i>  | 0.03 ± 0.01 <i>c</i>  |                      |
|                          | Glycosylated flavonoids | Q-diGlu                                     | 0.18 ± 0.04 <i>b</i>  | 0.07 ± 0.01 <i>d</i>  | 0.23 ± 0.03 <i>a</i>  | 0.12 ± 0.03 <i>c</i> |
|                          | K-dihex-dhex            | 0.03 ± 0.01 <i>a</i>                        | 0.01 ± 0.00 <i>b</i>  | 0.01 ± 0.00 <i>b</i>  | 0.00 ± 0.00 <i>b</i>  |                      |
|                          | K-hex-dhex              | 0.04 ± 0.01 <i>a</i>                        | 0.01 ± 0.00 <i>c</i>  | 0.02 ± 0.00 <i>b</i>  | 0.01 ± 0.00 <i>c</i>  |                      |
|                          | Rutin                   | 0.70 ± 0.19 <i>b</i>                        | 0.16 ± 0.09 <i>d</i>  | 0.95 ± 0.12 <i>a</i>  | 0.42 ± 0.12 <i>c</i>  |                      |
| Flavanols                | Catechin                | 2.27 ± 0.23 <i>a</i>                        | 1.87 ± 0.22 <i>b</i>  | 1.48 ± 0.21 <i>d</i>  | 1.16 ± 0.20 <i>c</i>  |                      |
|                          | Epicatechin             | 1.52 ± 0.09 <i>a</i>                        | 1.47 ± 0.23 <i>a</i>  | 0.79 ± 0.25 <i>c</i>  | 1.16 ± 0.20 <i>b</i>  |                      |
| <b>Xanthones</b>         | Mangiferin              | 1.69 ± 0.34 <i>a</i>                        | 1.16 ± 0.11 <i>bc</i> | 1.31 ± 0.23 <i>b</i>  | 1.01 ± 0.12 <i>c</i>  |                      |

Table S2. Content in six major phenolic compounds of mature leaves of *C. arabica* grown in Nicaragua and Colombia under full sun or shade condition.

| Country       | Genetic group    | Genotype      | 5-CQA |       | Catechin |       | K-hex-dhex |       | F-dihex |       | Rutin |       | Mangiferin |       |
|---------------|------------------|---------------|-------|-------|----------|-------|------------|-------|---------|-------|-------|-------|------------|-------|
|               |                  |               | Sun   | Shade | Sun      | Shade | Sun        | Shade | Sun     | Shade | Sun   | Shade | Sun        | Shade |
| Nicaragua     | APL<br>(mothers) | T5175         | 2.09  | 1.18  | 1.68     | 1.35  | 0.05       | 0.01  | 0.41    | 0.17  | 0.75  | 0.26  | 0.50       | 0.35  |
|               |                  | T8667         | 1.53  | 0.99  | 1.09     | 1.11  | 0.05       | 0.01  | 0.41    | 0.14  | 0.83  | 0.29  | 0.38       | 0.30  |
|               |                  | T5296         | 1.45  | 1.21  | 1.17     | 1.60  | 0.02       | 0.01  | 0.29    | 0.17  | 0.32  | 0.14  | 0.54       | 0.63  |
|               |                  | Catuai        | 0.97  | 0.41  | 1.31     | 0.79  | 0.06       | 0.00  | 0.26    | 0.07  | 0.72  | 0.13  | 0.42       | 0.20  |
|               |                  | T17931        | 0.46  | 0.71  | 0.47     | 1.45  | 0.03       | 0.02  | 0.27    | 0.22  | 0.31  | 0.19  | 0.17       | 0.23  |
|               | EWA<br>(fathers) | ET25          | 2.97  | 1.87  | 1.54     | 1.64  | 0.11       | 0.06  | 0.06    | 0.03  | 0.49  | 0.15  | 1.21       | 1.13  |
|               |                  | ET06          | 2.93  | 1.79  | 1.95     | 1.70  | 0.01       | 0.01  | 0.40    | 0.19  | 0.90  | 0.11  | 0.68       | 0.61  |
|               |                  | ET26          | 3.95  | 1.58  | 1.91     | 1.62  | 0.05       | 0.02  | 0.37    | 0.19  | 1.37  | 0.11  | 0.82       | 0.64  |
|               |                  | ET08          | 2.83  | 1.62  | 1.36     | 0.86  | 0.09       | 0.08  | 0.23    | 0.03  | 0.76  | 0.05  | 0.70       | 0.17  |
|               |                  | ET47          | 2.90  | 1.35  | 1.65     | 1.25  | 0.04       | 0.02  | 0.46    | 0.20  | 0.92  | 0.15  | 0.86       | 0.51  |
|               | HF1              | T5175 * ET25  | 1.64  | 0.84  | 1.84     | 2.05  | 0.06       | 0.02  | 0.28    | 0.14  | 0.51  | 0.13  | 0.66       | 0.61  |
|               |                  | T8667 * ET26  | 1.93  | 1.06  | 1.36     | 1.18  | 0.09       | 0.04  | 0.38    | 0.26  | 0.60  | 0.17  | 0.53       | 0.52  |
|               |                  | T8667 * ET47  | 1.34  | 0.67  | 1.62     | 1.02  | 0.06       | 0.01  | 0.41    | 0.16  | 0.59  | 0.07  | 0.51       | 0.27  |
|               |                  | Catuai * ET26 | 1.13  | 0.54  | 1.27     | 0.90  | 0.04       | 0.02  | 0.25    | 0.13  | 0.48  | 0.07  | 0.32       | 0.26  |
|               |                  | Catuai * ET47 | 2.45  | 1.37  | 2.04     | 1.89  | 0.05       | 0.01  | 0.37    | 0.19  | 0.56  | 0.09  | 0.83       | 0.58  |
|               |                  | T5175 * ET26  | 1.55  | 0.87  | 1.64     | 1.69  | 0.05       | 0.01  | 0.41    | 0.22  | 0.73  | 0.12  | 0.46       | 0.41  |
|               |                  | T17931 * ET26 | 0.78  | 0.79  | 0.96     | 0.87  | 0.05       | 0.03  | 0.36    | 0.24  | 0.60  | 0.23  | 0.31       | 0.41  |
|               |                  | T5175 * ET08  | 2.37  | 0.97  | 1.72     | 1.24  | 0.04       | 0.01  | 0.38    | 0.15  | 1.01  | 0.18  | 0.74       | 0.38  |
|               |                  | T17931 * ET47 | 0.65  | 0.59  | 0.87     | 0.83  | 0.06       | 0.03  | 0.34    | 0.25  | 0.47  | 0.28  | 0.25       | 0.17  |
|               |                  | T17931 * ET25 | 0.68  | 0.76  | 1.03     | 1.49  | 0.04       | 0.03  | 0.19    | 0.09  | 0.31  | 0.11  | 0.35       | 0.44  |
|               |                  | T5175 * 17931 | 0.93  | 0.91  | 1.20     | 1.48  | 0.04       | 0.01  | 0.42    | 0.16  | 0.60  | 0.15  | 0.28       | 0.36  |
|               |                  | T8667 * T5296 | 0.60  | 0.55  | 0.73     | 0.83  | 0.04       | 0.01  | 0.34    | 0.19  | 0.60  | 0.12  | 0.25       | 0.23  |
| T5296 * 17931 | 1.35             | 0.83          | 1.19  | 1.56  | 0.05     | 0.01  | 0.45       | 0.16  | 0.73    | 0.19  | 0.47  | 0.42  |            |       |
| Colombia      | APL<br>(mothers) | CX2385        | 1.99  | 1.85  | 1.66     | 1.54  | 0.08       | 0.02  | 0.95    | 0.53  | 1.40  | 0.59  | 0.75       | 0.65  |
|               |                  | CU1842        | 2.64  | 2.22  | 1.98     | 2.08  | 0.07       | 0.02  | 0.95    | 0.65  | 1.96  | 0.73  | 1.16       | 0.92  |
|               | EWA<br>(fathers) | E057          | 3.82  | 2.54  | 1.33     | 1.31  | 0.08       | 0.06  | 0.42    | 0.25  | 1.31  | 0.58  | 1.34       | 1.05  |
|               |                  | E286          | 3.63  | 2.86  | 0.97     | 1.30  | 0.25       | 0.17  | 0.26    | 0.12  | 1.10  | 0.44  | 1.40       | 1.33  |
|               |                  | E554          | 3.60  | 2.64  | 0.91     | 0.85  | 0.30       | 0.04  | 0.31    | 0.10  | 1.32  | 0.32  | 2.77       | 1.62  |
|               | HF1              | CX2385 x E286 | 2.51  | 2.37  | 1.16     | 2.06  | 0.12       | 0.06  | 0.34    | 0.27  | 1.35  | 0.67  | 0.96       | 0.93  |
|               |                  | CX2385 x E057 | 2.49  | 2.08  | 1.53     | 1.01  | 0.13       | 0.03  | 0.39    | 0.36  | 1.75  | 0.49  | 1.04       | 0.75  |
|               |                  | CX2385 x E554 | 2.33  | 1.79  | 2.01     | 1.82  | 0.14       | 0.02  | 0.95    | 0.57  | 1.81  | 0.46  | 1.04       | 0.62  |
|               |                  | CU1842 x E286 | 2.80  | 2.21  | 1.47     | 2.09  | 0.11       | 0.05  | 0.45    | 0.31  | 1.45  | 0.70  | 1.01       | 0.92  |
|               |                  | CU1842 x E057 | 2.58  | 2.29  | 1.10     | 1.92  | 0.05       | 0.00  | 0.40    | 0.43  | 1.42  | 0.61  | 1.11       | 0.99  |
|               |                  | CU1842 x E554 | 2.84  | 1.79  | 1.72     | 1.59  | 0.08       | 0.00  | 0.60    | 0.28  | 1.70  | 0.48  | 1.46       | 0.75  |
